# Supplementary material
Source: publisher site journal article supplement (https://static.cambridge.org/content/id/urn:cambridge.org:id:article:S0022109020000010/resource/name/S0022109020000010supp001.zip)
Supplement: Supplementary file 1 [file S0022109020000010supp001.zip]

## Appendix

TABLE A1

### **Cross-Sectional Heterogeneity in Multi-Province Borrowing**

The observations in Table A1 are at the firm-province-month level, and the sample consists only of multi-province borrowing firms. MINING\_WINDFALL\_OTH\_PROV (the mining windfall of other provinces) is averaged using the firm's loan balance in each province last month as the weight for the province. SHARE\_DEBT is the share of the firm's debt borrowed in that province.  $\ln(\text{CUM\_DEBT})$  is the natural logarithm of all the cumulative debt borrowed since the beginning of the firm's presence in a province. BANK\_DENS (bank density in province) is the total number of banks present in the province (regardless of the firm) divided by the total banks present in the country at that moment. Province fixed effects are for provinces of the focal province and for the province with the largest debt last month.  $t$ -statistics based on standard errors double-clustered by year-month and by province are in parentheses. \*, \*\*, and \*\*\* indicate significance at the 10%, 5%, and 1% levels, respectively.

TABLE A1 (continued)

| Variables                             | Dependent Variable:<br>Log of New Debt over the Next 12 Months<br>Deflated by Log of Existing Debt |                       |                   |
|---------------------------------------|----------------------------------------------------------------------------------------------------|-----------------------|-------------------|
|                                       | 1                                                                                                  | 2                     | 3                 |
| MINING_WINDFALL                       | 3.697**<br>(2.21)                                                                                  | 4.028**<br>(2.36)     | 3.992**<br>(2.52) |
| MINING_WINDFALL_OTH_PROV              | 2.088<br>(1.27)                                                                                    | -0.719<br>(-0.90)     | -3.984<br>(-1.24) |
| ... × SHARE_DEBT                      | -13.178**<br>(-2.31)                                                                               |                       |                   |
| ... × ln(CUM_DEBT)                    |                                                                                                    | -0.925**<br>(-2.29)   |                   |
| ... × BANK_DENS                       |                                                                                                    |                       | 3.776<br>(0.68)   |
| SHARE_DEBT                            | -5.254***<br>(-34.71)                                                                              |                       |                   |
| ln(CUM_DEBT)                          |                                                                                                    | -0.815***<br>(-22.94) |                   |
| BANK_DENS                             |                                                                                                    |                       | 1.017<br>(0.36)   |
| Province population last year         | Yes                                                                                                | Yes                   | Yes               |
| Firm fixed effects                    | Yes                                                                                                | Yes                   | Yes               |
| Province fixed effects                | Yes                                                                                                | Yes                   | Yes               |
| Province of other shock fixed effects | Yes                                                                                                | Yes                   | Yes               |
| Year-month fixed effects              | Yes                                                                                                | Yes                   | Yes               |
| $R^2$                                 | 0.34                                                                                               | 0.29                  | 0.28              |
| Sample size                           | 256,326                                                                                            | 256,326               | 256,171           |
| No. of clusters 1 (year-month)        | 125                                                                                                | 125                   | 125               |
| No. of clusters 2 (province)          | 100                                                                                                | 100                   | 100               |

TABLE A2

**Description of Weighted Classification and Judicial Status**

Panel A of Table A2 describes a firm's weighted classification of loans (WGT\_CLASS) and the judicial-status dummy of its loans (JUDICIAL\_STATUS) for the sample in Panel A of Table 9.

Panel B reports the best and worst yearly averages of these variables. Panel C reports descriptive regressions of whether a firm receives a new loan over the next 12 months using the sample; standard errors in these regressions are double-clustered at the level of firms and provinces of headquarters (HQ). Panel D describes the averages of the variables of interest for the years in which GDP\_GROWTH (yearly real gross domestic product (GDP) growth) takes its best and worst values during the sample period. Panel E reports descriptive regressions of the variables of interest on GDP\_GROWTH.

TABLE A2 (continued)

*Panel A*

| Variables       | Mean | Std. Dev. | P10  | P50  | P90  |
|-----------------|------|-----------|------|------|------|
| WGT_CLASS       | 0.55 | 1.26      | 0.00 | 0.00 | 3.00 |
| JUDICIAL_STATUS | 0.10 |           | 0.00 | 0.00 | 0.00 |

*Panel B*

| Variables       | Yearly Average |       |
|-----------------|----------------|-------|
|                 | Best           | Worst |
| WGT_CLASS       | 0.345          | 0.822 |
| JUDICIAL_STATUS | 0.055          | 0.153 |

*Panel C*

| Variables                                 | Dependent Variable:<br>Firm Receives New Loan over the Next 12 Months |                       |                        |                      |
|-------------------------------------------|-----------------------------------------------------------------------|-----------------------|------------------------|----------------------|
|                                           | 1                                                                     | 2                     | 3                      | 4                    |
| WGT_CLASS                                 | −0.176***<br>(−388.68)                                                | −0.102***<br>(−24.36) |                        |                      |
| JUDICIAL_STATUS                           |                                                                       |                       | −0.640***<br>(−308.53) | −0.250***<br>(−9.71) |
| Firm fixed effects                        | No                                                                    | Yes                   | No                     | Yes                  |
| Province of HQ × year-month fixed effects | No                                                                    | Yes                   | No                     | Yes                  |
| $R^2$                                     | 0.32                                                                  | 0.62                  | 0.23                   | 0.61                 |
| Sample size                               | 465,225                                                               | 463,118               | 465,239                | 463,133              |
| No. of clusters 1 (firm)                  |                                                                       | 12,003                |                        | 12,004               |
| No. of clusters 2 (province of HQ)        |                                                                       | 71                    |                        | 71                   |

*Panel D*

| GDP_GROWTH | Average   |                 |
|------------|-----------|-----------------|
|            | WGT_CLASS | JUDICIAL_STATUS |
| Best year  | 0.35      | 0.06            |
| Worst year | 0.80      | 0.15            |

*Panel E*

| Variables   | Dependent Variables   |                       |
|-------------|-----------------------|-----------------------|
|             | WGT_CLASS             | JUDICIAL_STATUS       |
| GDP_GROWTH  | −0.021***<br>(−40.06) | −0.004***<br>(−34.17) |
| $R^2$       | 0.00                  | 0.00                  |
| Sample size | 465225                | 465239                |
